# Supplementary material for: HIDDEN2: Study protocol for the hospital deep vein thrombosis detection study in patients with cancer receiving palliative care
Source: PubMed Central journal article supplement — BMJ Open. 2023 Sep 5;13(9):e073049. doi: 10.1136/bmjopen-2023-073049 (PMC10481726; doi:10.1136/bmjopen-2023-073049), 2023-09-05
Supplement: bmjopen-2023-073049.reviewer_comments.pdf [file bmjopen-2023-073049.reviewer_comments.pdf]

## PEER REVIEW HISTORY

BMJ Open publishes all reviews undertaken for accepted manuscripts. Reviewers are asked to complete a checklist review form (<http://bmjopen.bmj.com/site/about/resources/checklist.pdf>) and are provided with free text boxes to elaborate on their assessment. These free text comments are reproduced below.

## ARTICLE DETAILS

|                            |                                                                                                                                                                                                                                                    |
|----------------------------|----------------------------------------------------------------------------------------------------------------------------------------------------------------------------------------------------------------------------------------------------|
| <b>TITLE (PROVISIONAL)</b> | HIDDEN2: Study Protocol for the Hospital Deep Vein Thrombosis Detection Study in Cancer Patients Receiving Palliative Care                                                                                                                         |
| <b>AUTHORS</b>             | Kitson, Terri; Osborne, Emma; Noble, S; Pease, Nikki; Alikhan, Raza; Bryant, Catherine; Groves, Tristan; Wallace, Rebecca; Walker, Sarah; Seddon, Kathy; Smith, Deb; Raisanen, Lawrence; Smith, Joanna; Thomas, Ian; Upton, Laura; Casbard, Angela |

This article was not externally reviewed at BMJ Open. Protocols that have been independently assessed prior to submission to BMJ Open are usually fast-tracked to publication on the grounds that further substantial changes will not be possible. This independent assessment will usually be external, independent review for both a substantial grant award from a non-commercial or government funder and ethics approval.
